# Supplementary material for: Sesquiterpene binding Gly-Leu-Ser/Lys-“co-adaptation pocket” to inhibit lung cancer cell epithelial–mesenchymal transition
Source: PubMed Central journal article supplement (PMC5642546; doi:10.18632/oncotarget.19599), 2017-07-26
Supplement: oncotarget-08-70192-s001.pdf [file oncotarget-08-70192-s001.pdf]

## Sesquiterpene binding Gly-Leu-Ser/Lys-“co-adaptation pocket” to inhibit lung cancer cell epithelial–mesenchymal transition

### SUPPLEMENTARY MATERIALS

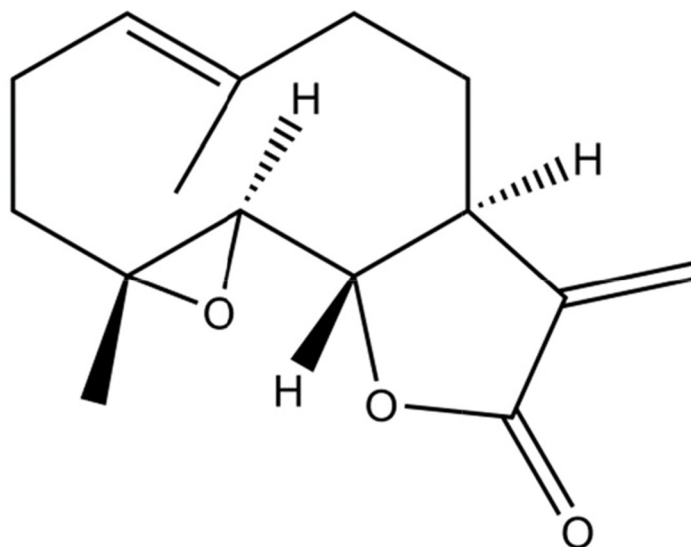

Supplementary Figure 1: The molecular formula PTL.

**Supplementary Table 1: Potential targets calculated by reverse prediction based on PTL activity**

| Proteins                                       | Property                                                                 |                                    |                                                          |
|------------------------------------------------|--------------------------------------------------------------------------|------------------------------------|----------------------------------------------------------|
| ERK                                            | Potential targets calculated by reverse prediction based on PTL activity | Proteins with available structures | Proteins with extremely similar active center structures |
| Human Cyclooxygenase-2                         |                                                                          |                                    |                                                          |
| Human Microsomal P450 1A2                      |                                                                          |                                    |                                                          |
| Selective Aldehyde Dehydrogenase 1A1           |                                                                          |                                    |                                                          |
| Cytochrome P450 3A4                            |                                                                          |                                    |                                                          |
| mTOR kinase                                    |                                                                          |                                    |                                                          |
| Human placental aromatase                      |                                                                          |                                    |                                                          |
| Transcription factor-DNA complex               |                                                                          |                                    |                                                          |
| thyroid stimulating hormone receptor           |                                                                          |                                    |                                                          |
| Thrombopoietin                                 |                                                                          |                                    |                                                          |
| Nitric oxide synthase,inducible                |                                                                          |                                    |                                                          |
| Transcriptional activator Myb                  |                                                                          |                                    |                                                          |
| Microtubule-associated protein                 |                                                                          |                                    |                                                          |
| Nuclear factor NF-kappa-B p105 subunit         |                                                                          |                                    |                                                          |
| Microphthalmia-associated transcription factor |                                                                          |                                    |                                                          |
| prelamin-A/C                                   |                                                                          |                                    |                                                          |
| Anthrax lethal factor                          |                                                                          |                                    |                                                          |
